# Supplementary material for: Cocatalyst engineering of a narrow bandgap Ga-La5Ti2Cu0.9Ag0.1O7S5 photocatalyst towards effectively enhanced water splitting
Source: Royal Society of Chemistry journal article supplement (doi:10.1039/d1ta08770c), 2021-01-01
Supplement: d1ta08770c1.pdf [file d1ta08770c1.pdf]

## Electronic Supplementary Information

# Cocatalyst Engineering on a Narrow Bandgap Ga-La<sub>5</sub>Ti<sub>2</sub>Cu<sub>0.9</sub>Ag<sub>0.1</sub>O<sub>7</sub>S<sub>5</sub> Photocatalyst Towards Effectively Enhanced Water Splitting

*Qi Xiao,<sup>1,2</sup> Jiadong Xiao,<sup>1</sup> Junie Jhon M. Vequizo,<sup>1</sup> Takashi Hisatomi,<sup>1</sup> Mamiko Nakabayashi,<sup>3</sup> Shanshan Chen,<sup>1</sup> Zhenhua Pan,<sup>1</sup> Lihua Lin,<sup>1</sup> Naoya Shibata,<sup>3</sup> Akira Yamakata,<sup>4</sup> Tsuyoshi Takata,<sup>1</sup> and Kazunari Domen<sup>\*1,5</sup>*

<sup>1</sup> Research Initiative for Supra-Materials, Shinshu University, 4-17-1 Wakasato, Nagano-shi, Nagano 380-8553, Japan.

<sup>2</sup> State Key Laboratory for Modification of Chemical Fibers and Polymer Materials, College of Materials Science and Engineering, Donghua University, Shanghai 201620, China.

<sup>3</sup> Institute of Engineering Innovation, The University of Tokyo, 2-11-16 Yayoi, Bunkyo-ku, 113-8656 Tokyo, Japan.

<sup>4</sup> Graduate School of Engineering, Toyota Technological Institute, 2-12-1 Hisakata, Tempaku-ku, Nagoya 468-8511, Japan.

<sup>5</sup> Office of University Professors, The University of Tokyo, 2-11-16 Yayoi, Bunkyo-ku, Tokyo 113-8656, Japan.

\*E-mail: domen@chemsys.t.u-tokyo.ac.jp; domen@shinshu-u.ac.jp.

## Supporting Figures

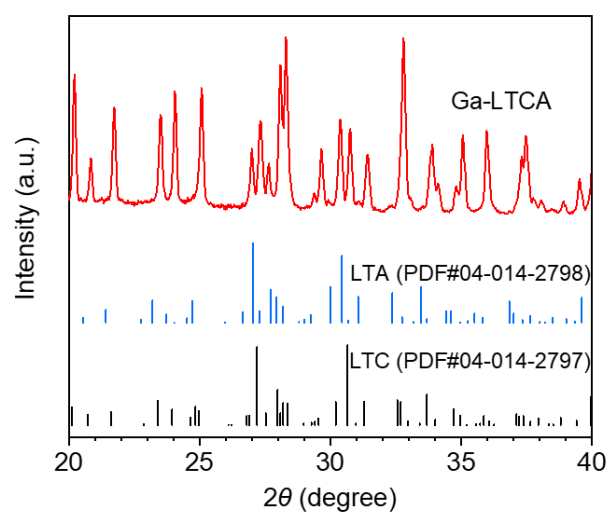

**Figure S1.** XRD pattern for the as-prepared Ga-LTCA sample. The reference XRD patterns for LTC and LTA refer to ICDD PDF#04-014-2797 and PDF#04-014-2798, respectively.

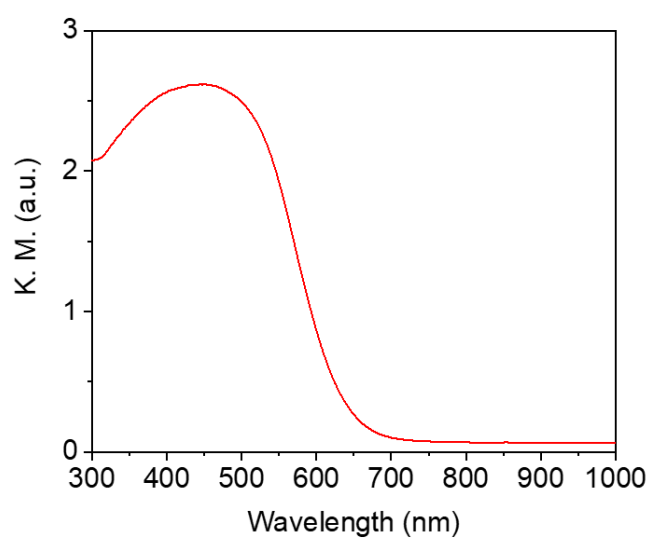

**Figure S2.** UV-vis DRS data obtained from the as-prepared Ga-LTCA sample.

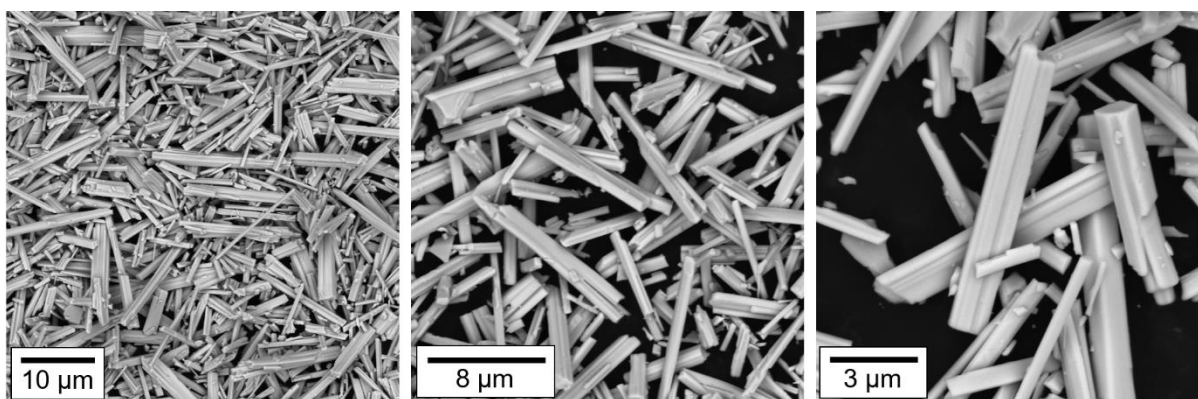

**Figure S3.** SEM images of the Ga-LTCA sample.

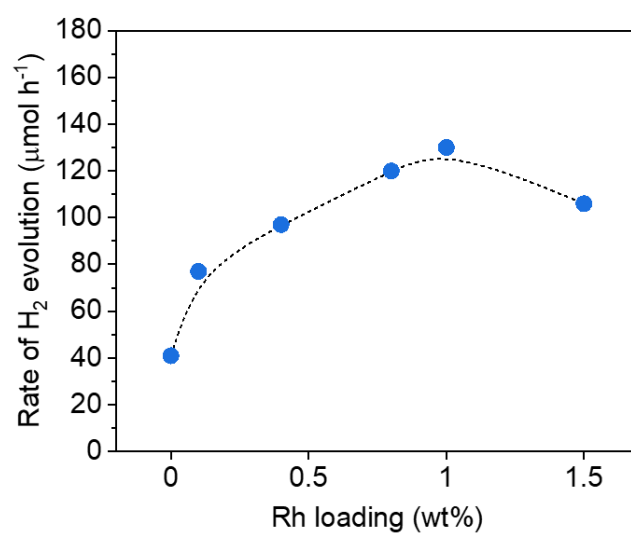

**Figure S4.** Photocatalytic H<sub>2</sub> evolution rates over Ga-LTCA photocatalysts prepared using the photodeposition method for cocatalyst loading with various Rh loading amounts.

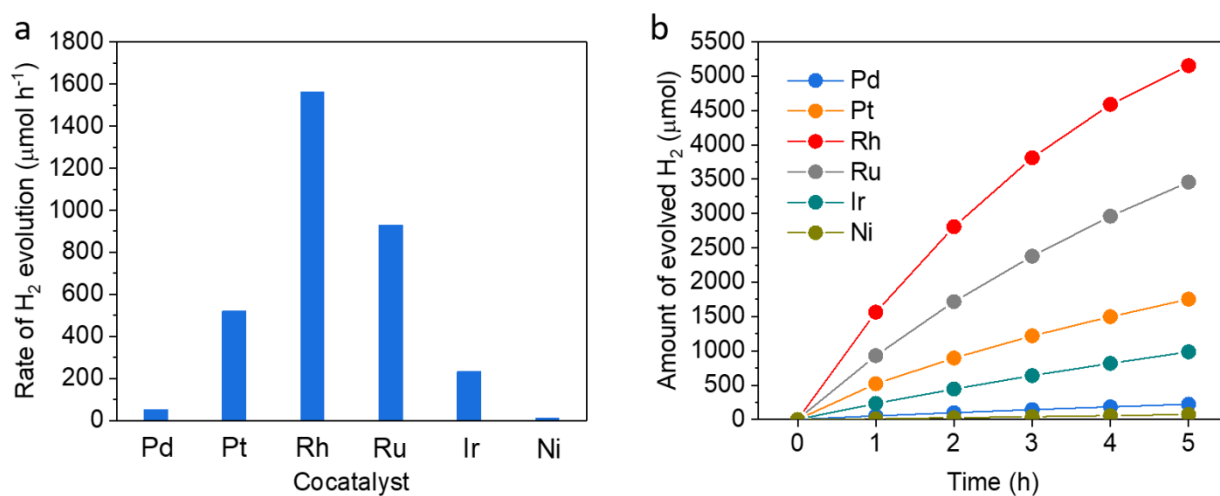

**Figure S5.** (a) Photocatalytic H<sub>2</sub> evolution rates over Ga-LTCA photocatalysts modified using the impregnation method with 0.4 wt% of different cocatalyst metals. (b) Time courses of H<sub>2</sub> gas evolution over Ga-LTCA photocatalysts modified using the impregnation method with different cocatalyst metals at 0.4 wt%.

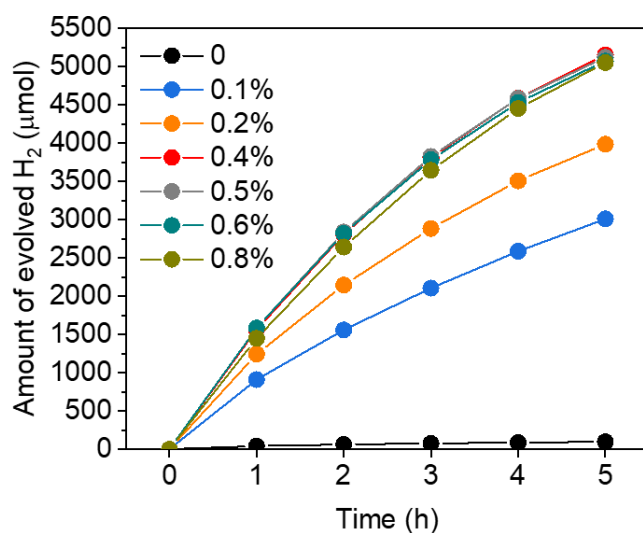

**Figure S6.** Time courses of H<sub>2</sub> gas evolution using Ga-LTCA photocatalysts modified with different amounts of the Rh cocatalyst using the impregnation method.

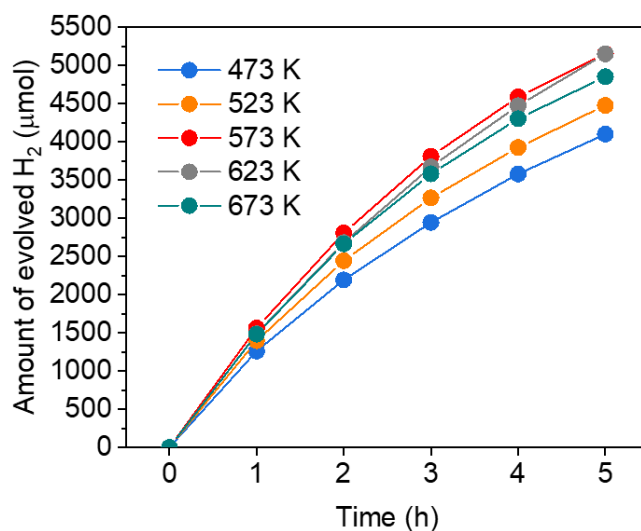

**Figure S7.** Time courses of H<sub>2</sub> gas evolution over photocatalysts loaded with a Rh cocatalyst and heated at different reduction temperatures following impregnation.

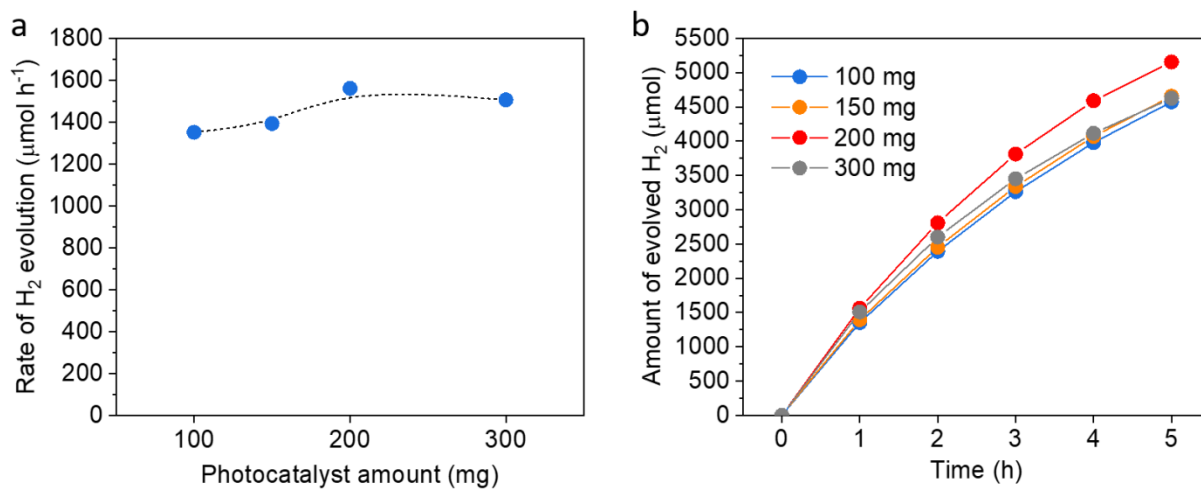

**Figure S8.** (a) The effect of the amount of the 0.4 wt% Rh(IMP)/Ga-LTCA photocatalyst on the photocatalytic H<sub>2</sub> evolution rate. (b) Time courses of H<sub>2</sub> gas evolution reactions using different amounts of the 0.4 wt% Rh(IMP)/Ga-LTCA photocatalyst.

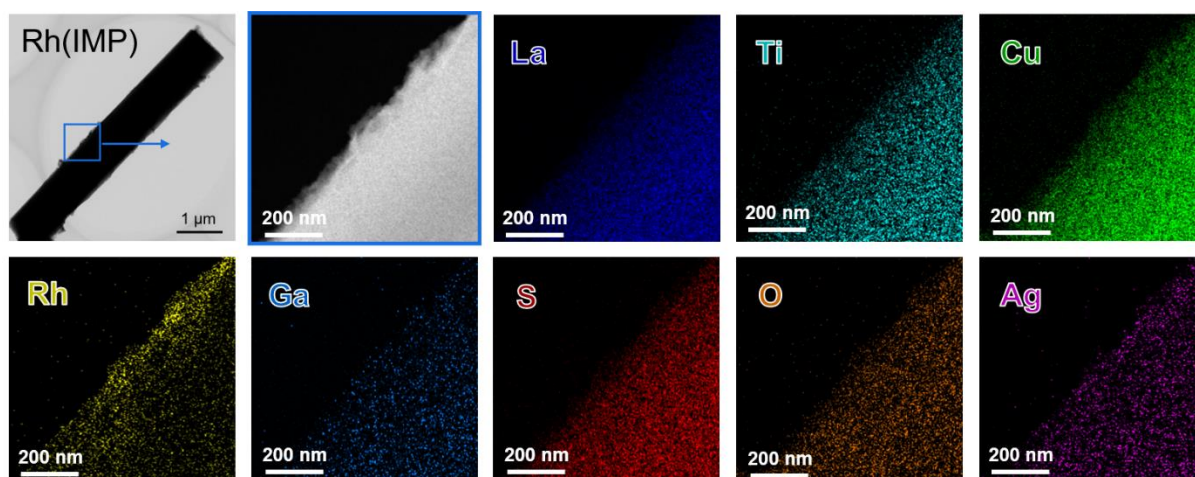

**Figure S9.** TEM and STEM-EDS mapping of a 0.4 wt% Rh(IMP)/Ga-LTCA sample.

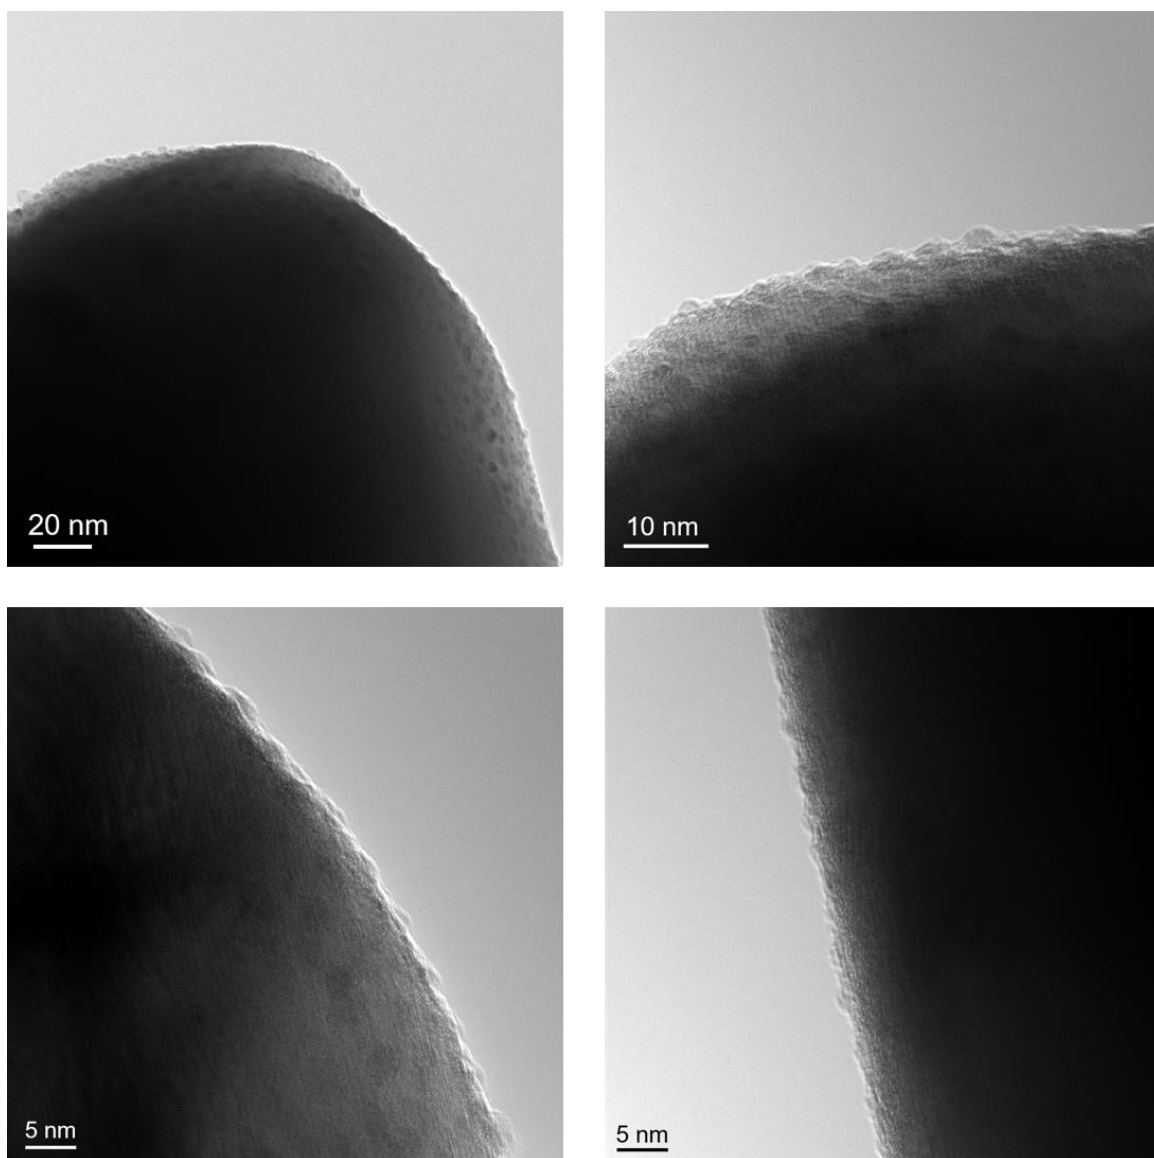

**Figure S10.** Additional HRTEM images of a 0.4 wt% Rh(IMP)/Ga-LTCA sample showing that the Rh particles had hemispherical shapes and intimate contact with the Ga-LTCA surface.

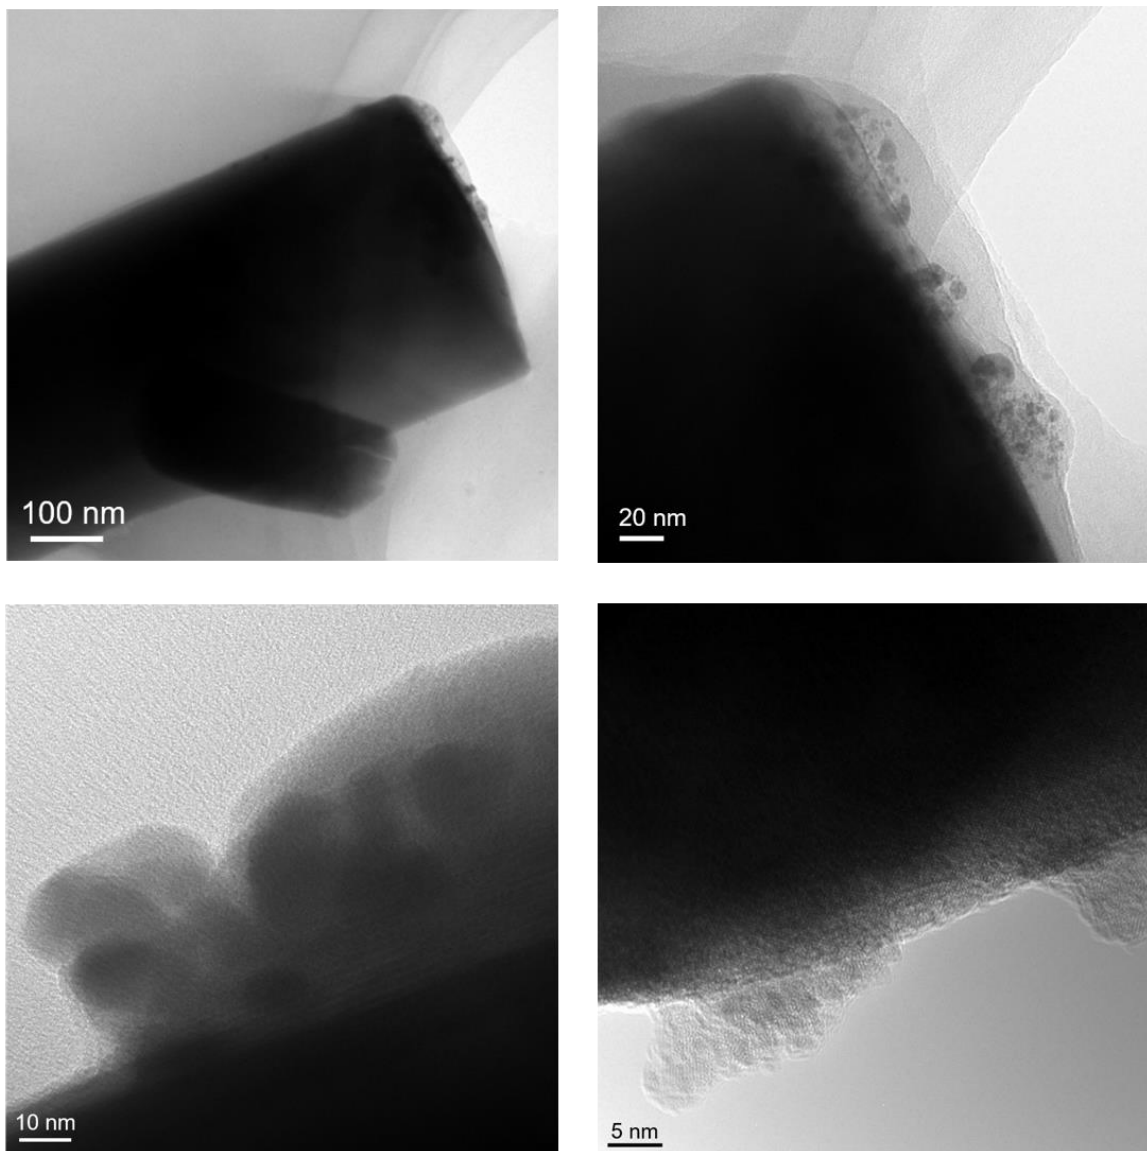

**Figure S11.** Additional TEM images of a 1.0 wt% Rh(PD)/Ga-LTCA sample showing that the Rh particles were aggregated on the top surfaces of the Ga-LTCA particles.



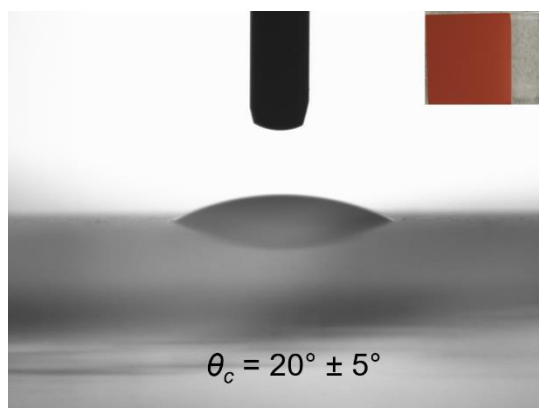

**Figure S12.** Photograph showing a Ga-LTCA photocatalyst film and associated water contact angle ( $\theta_c$ ).

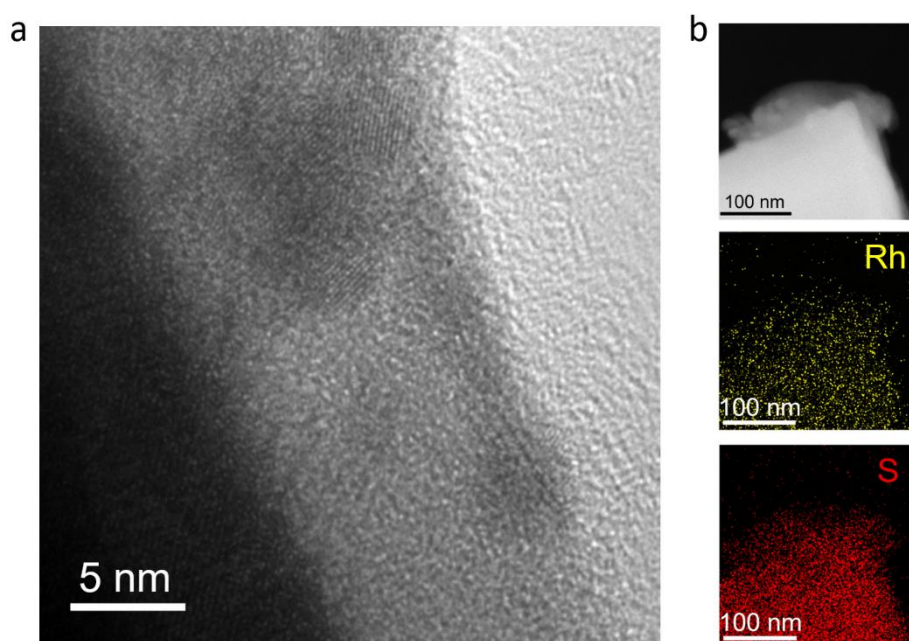

**Figure S13.** HRTEM image and STEM-EDS mapping of a 1.0 wt% Rh(PD)/Ga-LTCA sample.

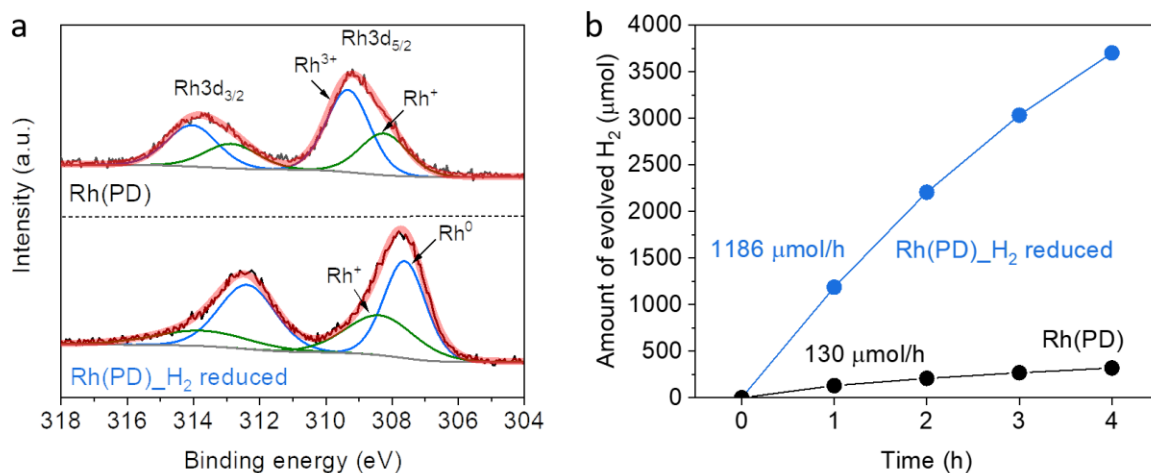

**Figure S14.** (a) XPS spectra of Rh species on Ga-LTCA loaded by photodeposition method (PD) and the same photocatalyst treated with H<sub>2</sub> reduction at 573 K for 1 h (H<sub>2</sub> reduced). (b) Time courses of H<sub>2</sub> gas evolution on Ga-LTCA loaded with a Rh cocatalyst using photodeposition (PD) and the same photocatalyst treated with H<sub>2</sub> reduction at 573 K for 1 h (H<sub>2</sub> reduced).

The 1.0 wt% Rh(PD)/Ga-LTCA sample was treated with H<sub>2</sub> reduction at 573 K for 1 h. As shown in the XPS spectra, the H<sub>2</sub>-reduced sample showed significant metallic Rh<sup>0</sup> species with minor Rh<sup>+</sup> species, which was similar with the XPS data of the Rh(IMP)/Ga-LTCA sample (Figure 2e in the main text). Moreover, the H<sub>2</sub> reduced sample was significantly improved HER activity (1186 μmol/h) compared with original PD sample (130 μmol/h). This result suggests that the metallic Rh<sup>0</sup> species are important for the improved photocatalytic activity. However, this activity is still lower than the HER activity of the 0.4 wt% Rh(IMP)/Ga-LTCA sample (1562 μmol/h). This is because the Rh loading amount and cocatalyst distribution are also important for the photocatalytic performance as is discussed in this work.

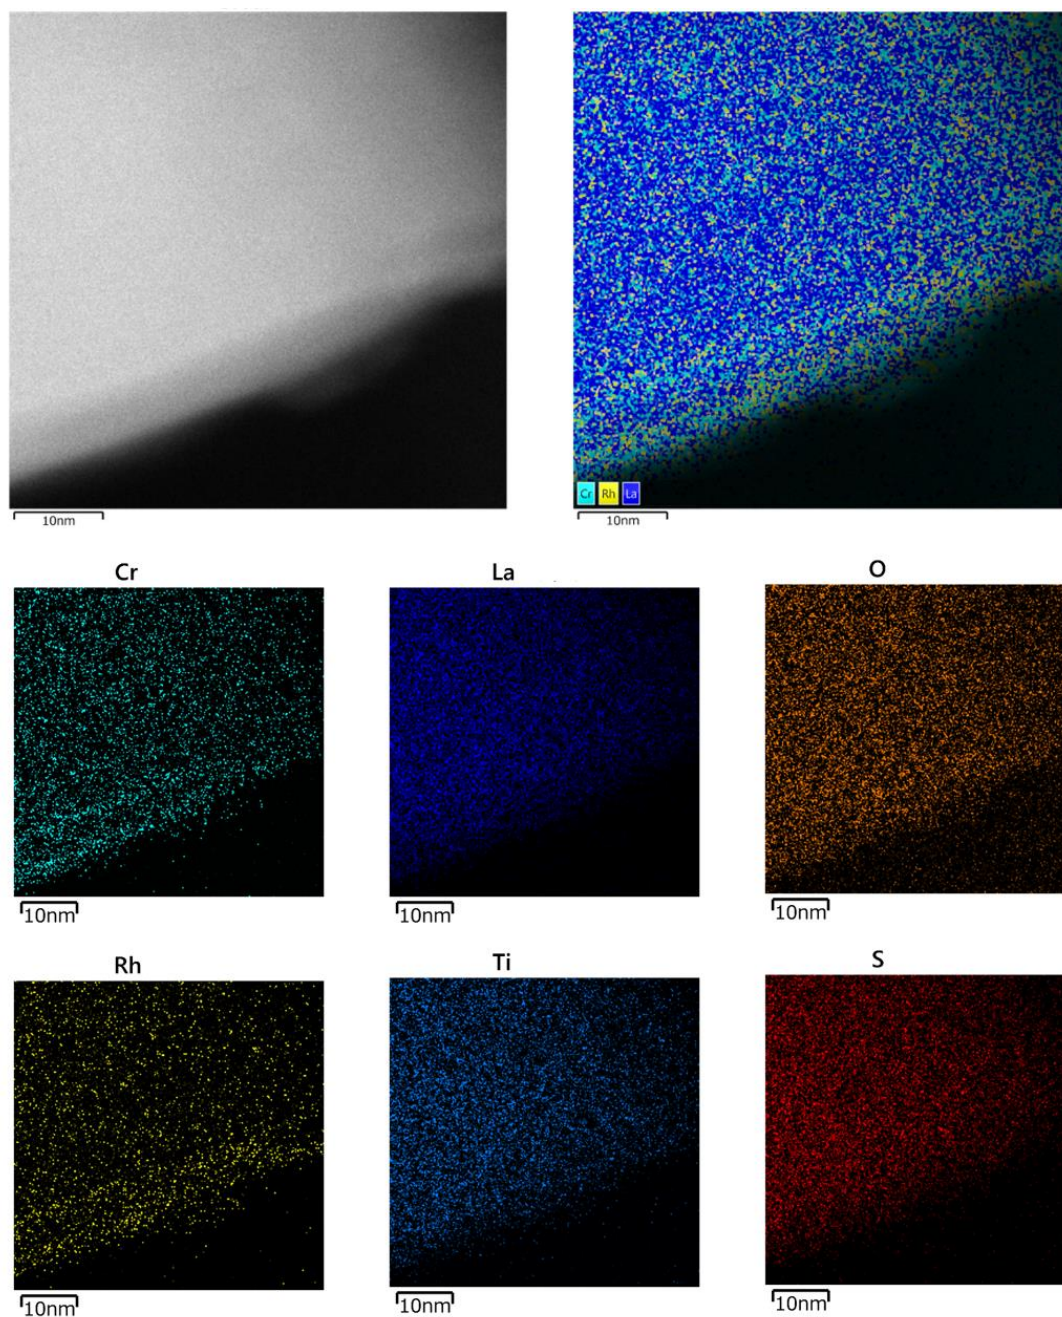

**Figure S15.** STEM-EDS mapping analysis of the 0.2 wt%  $\text{Cr}_2\text{O}_3$ /0.4 wt% Rh(IMP)/Ga-LTCA sample showing that Cr was in close proximity to the Rh, suggesting that the photoexcited electrons acted on the lateral surfaces of the Ga-LTCA particles.

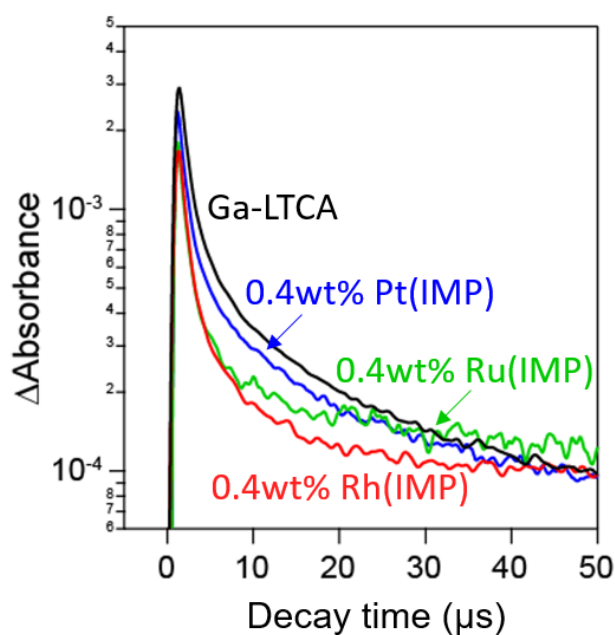

**Figure S16.** TA kinetic profiles of surviving electrons probed at  $5000\text{ cm}^{-1}$  (2000 nm) in various samples under 470 nm excitation ( $3\text{ mJ pulse}^{-1}$ ) for different cocatalysts: bare Ga-LTCA, 0.4 wt% Pt(IMP)/Ga-LTCA, 0.4 wt% Ru(IMP)/Ga-LTCA and 0.4 wt% Rh(IMP)/Ga-LTCA. The electron transfer efficiency increased in the order of  $\text{Rh} > \text{Ru} > \text{Pt}$  at the same loading amount (0.4 wt%). This result is in good agreement with the  $\text{H}_2$  evolution activity data obtained from Ga-LTCA loaded with different cocatalysts (**Figure S5**).

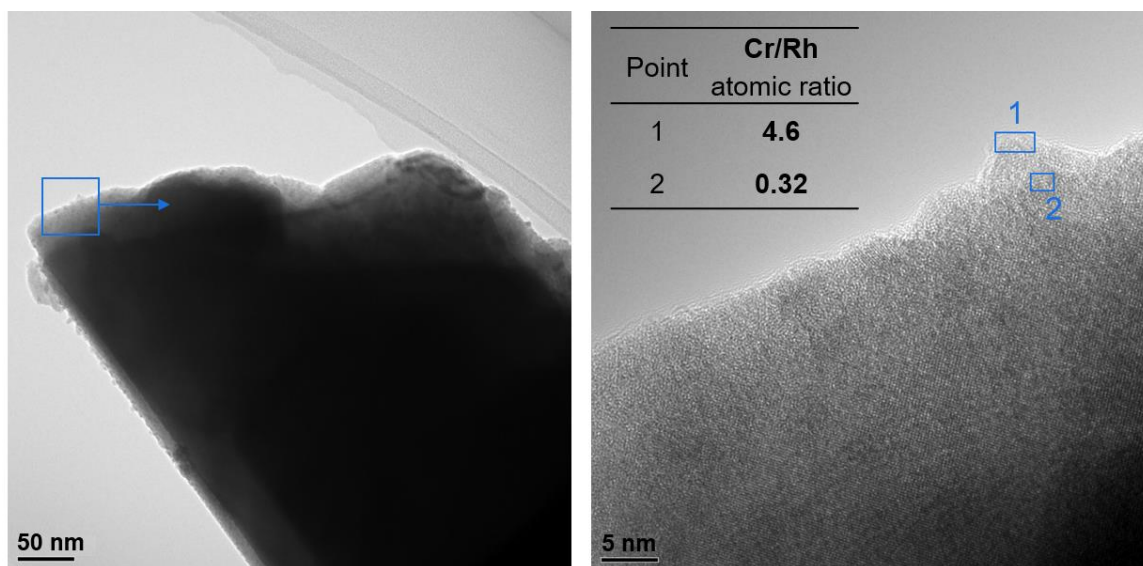

**Figure S17.** TEM images and EDS elemental analysis results for selected areas that confirm the Rh/Cr<sub>2</sub>O<sub>3</sub> core-shell structure in a 0.2 wt% Cr<sub>2</sub>O<sub>3</sub>/0.4 wt% Rh(IMP)/Ga-LTCA sample.

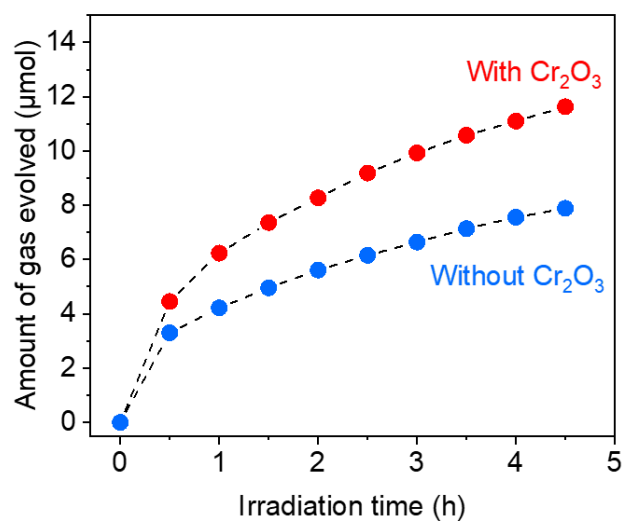

**Figure S18.** Time courses of H<sub>2</sub> gas evolution reactions using the 0.4 wt% Rh(IMP)/Ga-LTCA photocatalyst with and without Cr<sub>2</sub>O<sub>3</sub> in a 15 mM aqueous NaI solution under visible light ( $\lambda > 420$  nm). Reaction conditions: photocatalyst 50 mg, NaI aqueous solution (15 mM, 100 mL) adjusted to pH 4 by adding a 0.1 M aqueous H<sub>2</sub>SO<sub>4</sub> solution, Ar 5 kPa background pressure.

## Supporting Table

**Table S1.** Comparison of reported hydrogen evolution reaction activities over various oxysulfide photocatalysts.

| Photocatalyst<br>(Absorption edge)                                                                               | Cocatalyst | HER activity<br>( $\mu\text{mol h}^{-1}$ ) | AQY (%)       | Reference |
|------------------------------------------------------------------------------------------------------------------|------------|--------------------------------------------|---------------|-----------|
| Ga-La <sub>5</sub> Ti <sub>2</sub> Cu <sub>0.9</sub> Ag <sub>0.1</sub> O <sub>7</sub> S <sub>5</sub><br>(700 nm) | Rh         | 464                                        | 3.1 (420 nm)  | [1]       |
| La <sub>5</sub> Ti <sub>2</sub> AgO <sub>7</sub> S <sub>5</sub><br>(600 nm)                                      | Pt/NiS     | 250                                        | No data       | [2]       |
| Ga-La <sub>5</sub> Ti <sub>2</sub> Cu <sub>0.9</sub> Ag <sub>0.1</sub> O <sub>7</sub> S <sub>5</sub><br>(700 nm) | Pt/NiS     | 130                                        | No data       | [2]       |
| La <sub>5</sub> Ti <sub>2</sub> AgO <sub>7</sub> S <sub>5</sub><br>(600 nm)                                      | Pt         | 225                                        | 1.2 (420 nm)  | [3]       |
| La <sub>5</sub> Ti <sub>2</sub> CuO <sub>7</sub> S <sub>5</sub><br>(650 nm)                                      | Pt-PD/NiS  | 170                                        | 1.3 (420 nm)  | [4]       |
| La <sub>5</sub> Ti <sub>2</sub> CuO <sub>7</sub> S <sub>5</sub><br>(650 nm)                                      | Pt-IMP/NiS | 280                                        | 1.8 (420 nm)  | [5]       |
| Sm <sub>2</sub> Ti <sub>2</sub> O <sub>5</sub> S <sub>2</sub><br>(650 nm)                                        | Rh         | 350                                        | No data       | [6]       |
| Ag-Sm <sub>2</sub> Ti <sub>2</sub> O <sub>5</sub> S <sub>2</sub><br>(650 nm)                                     | Rh         | 949                                        | 8.8 (440 nm)  | [7]       |
| Y <sub>2</sub> Ti <sub>2</sub> O <sub>5</sub> S <sub>2</sub><br>(650 nm)                                         | Rh         | 125                                        | 5.3 (420 nm)  | [8]       |
| Ga-La <sub>5</sub> Ti <sub>2</sub> Cu <sub>0.9</sub> Ag <sub>0.1</sub> O <sub>7</sub> S <sub>5</sub><br>(700 nm) | Rh         | 1562                                       | 11.2 (420 nm) | This work |

## References

- [1] Pan, Z.; Xiao, Q.; Chen, S.; Wang, Z.; Lin, L.; Nakabayashi, M.; Shibata, N.; Takata, T.; Hisatomi, T.; Domen, K., Synthesis of a Ga-Doped  $\text{La}_5\text{Ti}_2\text{Cu}_{0.9}\text{Ag}_{0.1}\text{O}_7\text{S}_5$  Photocatalyst by Thermal Sulfidation for Hydrogen Evolution under Visible Light. *J. Catal.*, **2021**, *399*, 230-236.
- [2] Song, Z.; Hisatomi, T.; Chen, S.; Wang, Q.; Ma, G.; Li, S.; Zhu, X.; Sun, S.; Domen, K., Visible-Light-Driven Photocatalytic Z-Scheme Overall Water Splitting in  $\text{La}_5\text{Ti}_2\text{AgS}_5\text{O}_7$ -based Powder-Suspension System. *ChemSusChem*, **2019**, *12* (9), 1906-1910.
- [3] Suzuki, T.; Hisatomi, T.; Teramura, K.; Shimodaira, Y.; Kobayashi, H.; Domen, K., A Titanium-Based Oxysulfide Photocatalyst:  $\text{La}_5\text{Ti}_2\text{MS}_5\text{O}_7$  (M = Ag, Cu) for Water Reduction and Oxidation. *Phys. Chem. Chem. Phys.*, **2012**, *14* (44), 15475-15481.
- [4] Nandy, S.; Hisatomi, T.; Sun, S.; Katayama, M.; Minegishi, T.; Domen, K., Effects of Se Incorporation in  $\text{La}_5\text{Ti}_2\text{CuS}_5\text{O}_7$  by Annealing on Physical Properties and Photocatalytic  $\text{H}_2$  Evolution Activity. *ACS Appl. Mater. Interfaces*, **2019**, *11* (6), 5595-5601.
- [5] Nandy, S.; Hisatomi, T.; Ma, G.; Minegishi, T.; Katayama, M.; Domen, K., Enhancement of the  $\text{H}_2$  Evolution Activity of  $\text{La}_5\text{Ti}_2\text{Cu}(\text{S}_{1-x}\text{Se}_x)_5\text{O}_7$  Photocatalysts by Coloaded Pt and NiS Cocatalysts. *J. Mater. Chem. A*, **2017**, *5* (13), 6106-6112.
- [6] Zhao, W.; Maeda, K.; Zhang, F.; Hisatomi, T.; Domen, K., Effect of Post-Treatments on the Photocatalytic Activity of  $\text{Sm}_2\text{Ti}_2\text{S}_2\text{O}_5$  for the Hydrogen Evolution Reaction. *Phys. Chem. Chem. Phys.*, **2014**, *16* (24), 12051-12056.
- [7] Zhang, F.; Maeda, K.; Takata, T.; Domen, K., Modification of Oxysulfides with Two Nanoparticulate Cocatalysts to Achieve Enhanced Hydrogen Production from Water with Visible Light. *Chem. Commun.*, **2010**, *46* (39), 7313-7315.
- [8] Wang, Q.; Nakabayashi, M.; Hisatomi, T.; Sun, S.; Akiyama, S.; Wang, Z.; Pan, Z.; Xiao, X.; Watanabe, T.; Yamada, T.; Shibata, N.; Takata, T.; Domen, K., Oxysulfide Photocatalyst for Visible-Light-Driven Overall Water Splitting. *Nat. Mater.*, **2019**, *18* (8), 827-832.
